# Supplementary material
Source: Elsevier journal article supplement (https://www.sciencedirect.com/science/article/pii/S1885585717302013)
Supplement: mmc1 [file S1885585717302013:mmc1.pdf]

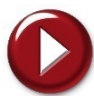

## Material suplementario

---

# La degeneración real de la prótesis aórtica Mitroflow: análisis con riesgos competitivos

---

## MÉTODOS

### Definición de variables preoperatorias e intraoperatorias<sup>1</sup>:

- **Insuficiencia renal:** el aclaramiento de creatinina se calculó utilizando la fórmula de Cockcroft-Gault. Esta fórmula utiliza los valores de creatinina sérica, la edad, el peso y el sexo. Según el aclaramiento de creatinina calculado, la función renal se ha dividido en: normal ( $> 85$  ml/min), disfunción moderada (50-85 ml/min), grave ( $< 50$  ml/min) y dependiente de diálisis.
- **Enfermedad pulmonar crónica:** enfermedad pulmonar que precise broncodilatadores o esteroides de forma crónica.
- **Enfermedad vascular periférica:** se define como la presencia de al menos una de las siguientes circunstancias: claudicación intermitente, estenosis carotídea superior al 50%, intervención previa o planificada sobre la aorta abdominal, arterias de una extremidad o carótidas o amputación por enfermedad arterial.
- **Movilidad reducida:** impedimento grave de la movilidad secundario a cualquier disfunción neurológica o musculoesquelética.
- **Infarto agudo de miocardio reciente:** infarto de miocardio dentro de los 90 días anteriores al procedimiento.
- **Endocarditis activa:** se define como aquella endocarditis que aún sigue tratándose con antibióticos para su resolución.

- **Estado preoperatorio crítico:** taquicardia o fibrilación ventricular, muerte súbita recuperada, masaje cardíaco preoperatorio, intubación previa a entrada en la sala de anestesia, utilización de inotropos o balón intraaórtico de contrapulsación, fallo renal agudo preoperatorio (anuria u oliguria < 10 ml/h).
- **Hipertensión pulmonar grave:** presión sistólica de la arteria pulmonar > 55 mmHg.
- **Disfunción ventricular:** la función ventricular se considera normal cuando la fracción de eyección del ventrículo izquierdo (FEVI) es superior al 50%. Se considera disfunción moderada cuando la FEVI se encuentra entre el 31 y el 50%, grave entre el 21 y el 30% y muy grave cuando la FEVI es del 20% o inferior.
- **Urgencia de la intervención:** esta variable se clasifica en 4 categorías:
  1. Electivo: admisión rutinaria para la cirugía.
  2. Urgente: pacientes que no han sido admitidos de forma electiva para la cirugía, pero que requieren ser intervenidos durante el ingreso debido a motivos médicos. Estos pacientes no pueden ser enviados a casa sin un procedimiento definitivo.
  3. Emergente: operación antes del inicio del día siguiente a haber tomado la decisión de operar.
  4. Rescatado o salvado: pacientes que requieren resucitación cardiopulmonar (masaje cardíaco externo) de camino al quirófano o antes de la inducción anestésica. Esto no incluye resucitación cardiopulmonar durante la inducción anestésica.

#### **Definición de variables durante el seguimiento<sup>2</sup>:**

- **Degeneración estructural valvular (DEV):** incluye la disfunción o el deterioro del correcto funcionamiento de la válvula excluyendo la infección o trombosis de esta. Puede indicarse durante una reintervención, una autopsia

o con la investigación clínica que incluye el seguimiento ecocardiográfico periódico. La DEV se refiere a cambios intrínsecos de la válvula, tales como desgaste, rotura, calcificación, interrupción de la línea de sutura de alguno de sus componentes, desgarró en uno de los velos o distorsión del *stent*.

- **Deterioro valvular no estructural:** se refiere a la presencia de alguna anomalía no intrínseca a la propia válvula que provoca una estenosis o una regurgitación de esta. Se trata de problemas (con exclusión de la trombosis y la infección) que no implican directamente a componentes de la válvula pero provocan su mal funcionamiento. Entre los distintos ejemplos se incluyen: *pannus*, dehiscencia periprotésica, fuga u obstrucción residual tras el implante y mala implantación de la válvula.
- **Mortalidad precoz/hospitalaria:** aquella muerte que se produce durante la intervención o tras la intervención (antes del alta hospitalaria o durante los 30 primeros días si el alta se produjo previamente).
- **Muerte de origen cardiaco/cardiológico:** en esta categoría se incluyen las muertes producidas durante el seguimiento relacionadas con la válvula (excluyendo la DEV), las muertes súbitas sin explicación y las muertes por causas cardíacas no relacionadas con la válvula (p. ej., insuficiencia cardíaca, infarto agudo de miocardio o arritmias).
- **Muerte de origen no cardiaco/cardiológico:** se incluyen todas las muertes de causa distinta a la muerte de origen cardiológico, excepto la DEV.
- **Endocarditis valvular protésica:** se trata de cualquier infección que afecte a una prótesis valvular cardíaca. Su diagnóstico se basa en uno de los siguientes criterios:
  1. Reintervención en la que se evidencia la presencia de un absceso, dehiscencia periprotésica, pus o vegetación y se confirma su origen infeccioso tras los estudios histológicos o bacteriológicos.
  2. Presencia durante la autopsia de un absceso, pus o vegetación en una válvula previamente reparada o sustituida.

3. En ausencia de los anteriores, se puede realizar su diagnóstico mediante los criterios de Duke para endocarditis.
4. No es obligatoria la presencia de hemocultivos positivos para su diagnóstico.

- **Accidente cerebrovascular:** se define como un déficit neurológico prolongado (mayor de 72 h) o permanente que se asocia generalmente con alteraciones en las imágenes tomadas mediante resonancia magnética o tomografía computarizada.
- **Reingreso de causa cardíaca/cardiológica:** se incluyen todos los ingresos hospitalarios relacionados con la válvula (incluyendo DEV) y por causas cardíacas no relacionados con la válvula (p. ej., insuficiencia cardíaca, infarto agudo de miocardio o arritmias).

## BIBLIOGRAFÍA

1. Nashef SA, Roques F, Sharples LD, et al. EuroSCORE II. *Eur J Cardiothorac Surg.* 2012;41:734-744.
2. Akins CW, Miller DC, Turina MI, et al. Guidelines for reporting mortality and morbidity after cardiac valve interventions. *Eur J Cardiothorac Surg.* 2008;33:523-528.

### Tabla del material suplementario

Características de los pacientes fallecidos como consecuencia directa de la degeneración estructural valvular

| Intervención quirúrgica o percutánea | Insuficiencia intraprotésica > II/IV | Gradiente medio (mmHg) | Gradiente máximo (mmHg) |
|--------------------------------------|--------------------------------------|------------------------|-------------------------|
| <b>Intervenidos 5 (25%)</b>          |                                      |                        |                         |
| <i>Grado funcional</i>               |                                      |                        |                         |
| NYHA I/IV 0 (0%)                     |                                      |                        |                         |
| NYHA II/IV 0 (0%)                    |                                      |                        |                         |
| NYHA III/IV 4 (80%)                  | 3 (75)                               | 65,00 ± 16,63          | 112,50 ± 21,50          |
| NYHA IV/IV 1 (20%)                   | 1 (100)                              | 69                     | 110                     |
| No valorable (0%)                    |                                      |                        |                         |
| <b>No intervenidos 15 (75%)</b>      |                                      |                        |                         |
| <i>Grado funcional</i>               |                                      |                        |                         |
| NYHA I/IV 1 (6,67%)                  | 1 (100)                              | 41                     | 71                      |
| NYHA II/IV 8 (53,33%)                | 6 (75)                               | 50,13 ± 9,34           | 86,00 ± 14,49           |
| NYHA III/IV 3 (20,00%)               | 1 (33,33)                            | 69,00 ± 4,58           | 110,00 ± 9,53           |
| NYHA IV/IV 0 (0%)                    |                                      |                        |                         |
| No valorable 3 (20%)                 | 2 (66,67)                            | 65,00 ± 5,19           | 114,67 ± 6,03           |

NYHA: *New York Heart Association*.

Los datos se expresan n (%) o media ± desviación estándar.

6

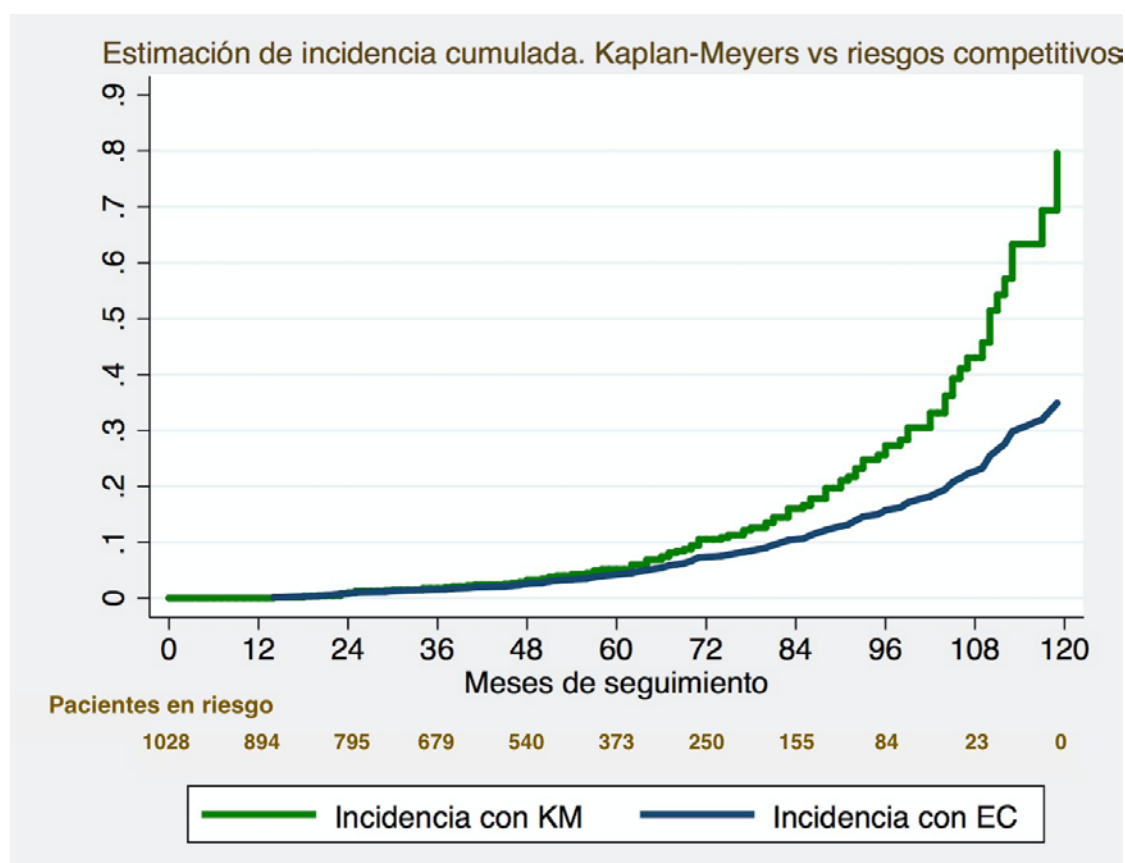

**Figura 2 del material suplementario.** Comparación de la incidencia acumulada calculada mediante la estimación de Kaplan-Meier (KM) frente a análisis de riesgos competitivos. EC: eventos competitivos.
